# Supplementary material for: Engineering the acyltransferase domain of epothilone polyketide synthase to alter the substrate specificity
Source: PubMed Central journal article supplement (PMC8058987; doi:10.1186/s12934-021-01578-3), 2021-04-21
Supplement: 12934_2021_1578_MOESM1_ESM.pdf [file 12934_2021_1578_MOESM1_ESM.pdf]

**Engineering the acyltransferase domain of epothilone polyketide synthase to alter the substrate specificity**

[Huimin Wang]<sup>1</sup> [Junheng Liang]<sup>1</sup> [Qianwen Yue]<sup>1</sup> [Long Li]<sup>2</sup> [Yan Shi]<sup>1</sup> [Guosong Chen]<sup>2</sup> [Yue-zhong Li]<sup>3</sup> [Xiaoying Bian]<sup>3</sup> [Youming Zhang]<sup>3</sup> [Guoping Zhao]<sup>1, 4</sup> [Xiaoming Ding]<sup>1\*</sup>

<sup>1</sup>[Collaborative Innovation Center for Genetics and Development, State Key Laboratory of Genetic Engineering, Shanghai Engineering Research Center of Industrial Microorganisms, Department of Microbiology, School of Life Sciences, Fudan University, Shanghai, People's Republic of China]

<sup>2</sup>[The State Key Laboratory of Molecular Engineering of Polymers, Department of Macromolecular Science, Fudan University, Shanghai, People's Republic of China]

<sup>3</sup>[Shandong University-Helmholtz Institute of Biotechnology, State Key Laboratory of Microbial Technology, School of Life Sciences, Shandong University, Qingdao, Shandong, People's Republic of China]

<sup>4</sup>[CAS Key Laboratory of Synthetic Biology, Institute of Plant Physiology and Ecology, Shanghai Institutes for Biological Sciences, Chinese Academy of Sciences, Shanghai, People's Republic of China]

**\*Correspondence:**

Xiaoming Ding: Department of Microbiology, School of Life Sciences, Fudan University, Shanghai, 200438, People's Republic of China.

**E-mail:** [xmding74@fudan.edu.cn]

**Table S1.** Engineered module-swap fusion sites of hybrid epothilone PKSs. (EPOM3 = blue, intermodular linker between EPOM3 and EPOM4 = blue, EPOM7 = pink, intermodular linker between EPOM7 and EPOM8 = pink, ERYM6 = red, RAPM4 = sky blue, RAPM10 = deep pink, intermodular linker between EPOM4 and EPOM5 = orange, EPOM5 = light green)

|                            |                                                                                                                                                                                                                                                                                                                                                                                                                                                                                                                                                                                                                                                                                                                                                                                                                                                                                                                                                                                                                                                                                                                                                                                                                                                                                                                                                                                                                                                                                                                                                                                                                                                                                                                                                                                                                                                                                                           |
|----------------------------|-----------------------------------------------------------------------------------------------------------------------------------------------------------------------------------------------------------------------------------------------------------------------------------------------------------------------------------------------------------------------------------------------------------------------------------------------------------------------------------------------------------------------------------------------------------------------------------------------------------------------------------------------------------------------------------------------------------------------------------------------------------------------------------------------------------------------------------------------------------------------------------------------------------------------------------------------------------------------------------------------------------------------------------------------------------------------------------------------------------------------------------------------------------------------------------------------------------------------------------------------------------------------------------------------------------------------------------------------------------------------------------------------------------------------------------------------------------------------------------------------------------------------------------------------------------------------------------------------------------------------------------------------------------------------------------------------------------------------------------------------------------------------------------------------------------------------------------------------------------------------------------------------------------|
| <p>MMR2044<br/>(EPOM7)</p> | <p>.....RGFAEQGLDSLMAVEIRKRLQGELGMPLSATLAFDHPTVERLVE<br/> YLLSQA<u>LELQDR</u>TDVRSARLPATEEPIAIVGIGCRFPGGAGTPEAFW<br/> ELLDDGRDAIRPLEERWALVGVDPGDDVPRWAGLLTEAIDGFDAAF<br/> FGIAPREARSLDPQHRLLEVAWEGFEDAGIPPRSLVGSRTGVFVGV<br/> CATEYLHAAVAHQPREERDAYSTTGNMLSIAAGRLSYTLGLQGPC<br/> TVDTACSSSLVAIHLACRSLRARESDLALAGGVNMLLSPDTMRALA<br/> RTQALSPNGRCQTFDASANGFVRGEGCGLIVLKRLSDARRDGDRIW<br/> ALIRGSAINQDGRSTGLTAPNVLAQGALLREALRNAGVEAEAIGYIE<br/> THGAATSLGDPIEIEALRAVVGPARADGARCVLGAVKTNLGHLEGA<br/> AGVAGLIKATLSLHHERIPRNLNFRTLNPRIEGTALELATEPVPWPR<br/> TGRTRFAGVSSFGMSGTNAHVVLEEAPAVEPEAAAPERAAELFVLS<br/> AKSVAALDAQAARLRDHLEKHVELGLGDVAFSLTTTRSAMEHRLA<br/> VAASSREALRGALSAAAQGHTPPGAVRGRASGGSAPKVVVFVPGQ<br/> GSQWVGMGRKLMAEEPVFRAALEGCDRAIEAEAGWSLLGELSAD<br/> EAASQLGRIDVVQPVLFAMEVALSALWRSWGVEPEAVVGHSMGEV<br/> AAAHVAGALSLEDAVAIICRRSRLRRISGQGEMALVELSLEEAEA<br/> LRGHEGRLSVAVSNSPRSTVLAGEPAALSEVLAALTAAGVFWRVK<br/> VDVASHSPQVDPLREELVAALGAIRPRAAAVPMRSTVTGGVIAGPEL<br/> GASYWAGNLRQPVRFAAAARALLEGGPTLFIEMSPHPILVPLDEIQ<br/> TAVEQGGAAVGSLLRRGQDERATLLEALGTLWASGYPVSWARLFPAG<br/> GRRVPLPTYPWQHERCWIEVEPEARLAAADPTKDWFYRTDWPEV<br/> PRAAPKSETAHGSWLLLADRGGVGEAVAAALSTRGLSCTVLHASA<br/> DASTVAEQVSEAASRRNDWQGVLYLWGLDAVVDAGASADDVSEA<br/> TRRATAPVLGLVRFLSAAPHPPRFWVVTGACTVGGEPVSLCQAA<br/> LWGLARVVALEHPAAWGGLVDLDPQKSPTEIEPLVAELLSFDAEDQL<br/> AFRSGRRHAARLVAAPPEGDVAPISLSAEGSYLVTGGLGGLLVAR<br/> WLVERGARHLVLTSRHGLPERQASGGEQPPEARARIAAVEGLEAQQ<br/> ARVTVAAVDVAEADPMTALLAAIEPPLRGVVHAAGVFPVRPLAETD<br/> EALLESVLRPKVAGSWLLHRLLRDRPLDLFVLFSSGAAVWGGKGQ<br/> GAYAAANAFLDGLAHHRRARSLPALSLAWGLWAEGGMVDAKAHA<br/> RLSDIGVLPMATGPALSALERLVKTSVQSVTRMDWTRFAPVYAA<br/> RGRRNLLSALVAEDERTASPPVPTANRIWRGLSVAESRSALYELVRGI<br/> AARVLGFADPGALDVGRGFAEQGLDSLMALEIRNRLQRELGERLSA<br/> TLAFDHPTVERLVAHLLTDVLKLEDRSDTRHIRSVAAD<u>EPIAIVGAA</u><br/> <u>CRFP</u>GGVEDLESYWQLLAEGVVVSAEVPADRWDAADWYDPD.....</p> |
| <p>MMR2044<br/>(ERYM6)</p> | <p>.....RGFAEQGLDSLMAVEIRKRLQGELGMPLSATLAFDHPTVERLVE<br/> YLLSQA<u>LELQDR</u>TDVRSARLPATEDPIAIVGMACRFPGGVHNPGEL<br/> WEFIVGGDAVTEMPTDRGWDLDALFDPDPQRHGTSYSRHGAFLD</p>                                                                                                                                                                                                                                                                                                                                                                                                                                                                                                                                                                                                                                                                                                                                                                                                                                                                                                                                                                                                                                                                                                                                                                                                                                                                                                                                                                                                                                                                                                                                                                                                                                                                                                                                     |

|                    |                                                                                                                                                                                                                                                                                                                                                                                                                                                                                                                                                                                                                                                                                                                                                                                                                                                                                                                                                                                                                                                                                                                                                                                                                                                                                                                                                                                                                                                                                                                                                                                                                                                              |
|--------------------|--------------------------------------------------------------------------------------------------------------------------------------------------------------------------------------------------------------------------------------------------------------------------------------------------------------------------------------------------------------------------------------------------------------------------------------------------------------------------------------------------------------------------------------------------------------------------------------------------------------------------------------------------------------------------------------------------------------------------------------------------------------------------------------------------------------------------------------------------------------------------------------------------------------------------------------------------------------------------------------------------------------------------------------------------------------------------------------------------------------------------------------------------------------------------------------------------------------------------------------------------------------------------------------------------------------------------------------------------------------------------------------------------------------------------------------------------------------------------------------------------------------------------------------------------------------------------------------------------------------------------------------------------------------|
|                    | <p>GAADFDAFFGISPREALAMDPQQRQVLETTWELFENAGIDPHSLR<br/> GSDTGVFLGAAAYQGYGQDAVVPEDSEGILLTGNSSAVVSGRVAYVL<br/> GLEGPAVTVDACSSSLVALHSACGSLRDGDCGLAVAGGVSSVMAGP<br/> EVTFEFSRQGGGLAVDGRCKAFSAEADGFGFAEGVAVVLLQRLSDAR<br/> RAGRQVLGVVAGSAINQDGASNGLAAPSGVAQQRVIRKAWARAGI<br/> TGADVAVVEAHGTGTRLGDPVEASALLATYGKSRGSSGPVLLGSVK<br/> SNIGHAQAAAGVAGVIKVVVLGLNRGLVPPMLCRGERSPLIEWSSGG<br/> VELAEAVSPWPPAADGVRRAGVSAFGVSGTNAHVIIAEPPEPEPLPE<br/> PGPVGVLAANSVPVLLSARTETALAAQARLLESVDDSVPLTALA<br/> SALATGRAHLPRRAALLAGDHEQLRGQLRAVAEGVAAPGATTGTAS<br/> AGGVVVFVPGQGAQWEGMARGLLSVPVFAESIAECDAVLSEVAGFS<br/> ASEVLEQRPDAPSLERVDVVQPVLFSVMVSLARLWGACGVSPSAVI<br/> GHSQGEIAAAVVAGVLSLEDGVRVVALRAKALRALAGKGGMVSLA<br/> APGERARALIAPWEDRISVAAVNSPSSVVVSGDPEALAEVARCEDE<br/> GVRAKTLPVDYASHSRHVEEIRETILADLDGISARRAAIPLYSTLHGE<br/> RRDGADMGPYWDNLRSQVRFDEAVSAAVADGHATFVEMSPHP<br/> VLTAAVQEIAADAVAIGSLHRDTAEHLIAELARAHVHGVAVDWRN<br/> VFPAAPPVALPNYPFEPQRYWLAPEVSDQLADSRVVDWRPLATTP<br/> VDLEGGFLVHGSAPESLTSAVEKAGGRVVPVASADREALAAALREV<br/> PGEVAGVLSVHTGAATHLALHQLSLGEAGVRAPLWLVTSTRAVALGES<br/> EPVDPEQAMVWGLGRVMGLETPERWGGGLVDLPAEPAPGDGEAFVA<br/> CLGADGHEDQVAIRDHARYGRRLVRAPLGTRESSWEPAGTALVTGG<br/> TGALGGHVARHLARCGVEDLVLSRRGVDAPGAAELEAEVALGA<br/> KTTITACDVADREQLSKLLEELRGQGRPVRTVVHTAGVPESRPLHEI<br/> GELESVCAAKVTGARLLDELCPDAETVLFSSGAGVWGSANLGAY<br/> SAANAYLDALAHRRRAEGRAATSWAWGAWAGEGMATGDLEGLTR<br/> RGLRPMAPERAIRALHQALDNGDTCVSIADVDWERFAVGFTAARPR<br/> PLLDELVTPAVGAVPAVQAAPAREMTSQELLEFTHSHVAAILGHSSPD<br/> AVGQDQPFTELGFDSLTAVGLRNQLQATGLALPATLVFEHPTVRRL<br/> ADHIGQQLKLEDRSDTQHVWVSLASDEPIAIVGAACRFPGGVEDLE<br/> SYWQLLAEGVVVSAEVPADRWDAAADWYDPD.....</p> |
| MMR2027<br>(RAPM4) | <p>.....RGFAEQGLDSLMAVEIRKRLQGELGMPLSATLAFDHPTVERLVE<br/> YLLSQALELQDRTDVRSARLPATEEPLAIVGMACRLPGGVSSPEDL<br/> WRLVESGTDVAVSGFPTDRGWDVENLYDSDPEAAGKSYCVQGGFLD<br/> TAAGFDAGFFGISPREALAMDPQQRLLLEVSWEAFERAGIEPGSVR<br/> GSDTGVFIGAFPVGYGAGFDREGYGATSGPSVLSGRVSYVFGLEGP<br/> AITMDTACSSSLVALHLAAQALRNGECSMALAGGVTVMATPEVFTE<br/> FARQRGLASDGRCKAFADSADGAGFSEGAGLLLVERLSDARRNGH<br/> QVLAVVRGSAVNQDGASNGLTAPNGPSQQRVIRAALSNAAGLSTADV<br/> DVVEAHGTGTTLDGPIEAQALLATYGQDREQPLLLGSLKSNIGHTQ<br/> AASGVSGVIKMMALRHGFVPRTLHVDEPSRHVDWAAGAVELVRE<br/> NQPWPGTDRPRRAGVSSFGVSGTNAHVLESAPPAQPAEEEEQPVET<br/> PVVASDVLPLVISAKTQPALTEHEDRLRAYLAASPGADTRAVASTLA<br/> VTRSVFEHRAVLLGDDAVTGTAVTDPRVVFVPGQGWQWLGMGSA</p>                                                                                                                                                                                                                                                                                                                                                                                                                                                                                                                                                                                                                                                                                                                                                                                                                                                                                                                                                        |

|                             |                                                                                                                                                                                                                                                                                                                                                                                                                                                                                                                                                                                                                                                                                                                                                                                                                                                                                                                                                                                                                                                                                                                                                                                                                                                                                                                                                                                        |
|-----------------------------|----------------------------------------------------------------------------------------------------------------------------------------------------------------------------------------------------------------------------------------------------------------------------------------------------------------------------------------------------------------------------------------------------------------------------------------------------------------------------------------------------------------------------------------------------------------------------------------------------------------------------------------------------------------------------------------------------------------------------------------------------------------------------------------------------------------------------------------------------------------------------------------------------------------------------------------------------------------------------------------------------------------------------------------------------------------------------------------------------------------------------------------------------------------------------------------------------------------------------------------------------------------------------------------------------------------------------------------------------------------------------------------|
|                             | <p>LRDSSVVFAERMAECAALSEFVDWDLFAVLDDPAVVDRVDVVQP<br/> ASWAVMVSAAVWQAAGVRPDAVIGHSQGEIAAACVAGAVSLRDA<br/> ARIVTLRSQAIARGLAGRAAMASVALPAHEIELVDGAWIAAHNGPA<br/> STVIAGTPEAVDHVLTAEHARGVRVRRITVDYASHTPHVELIRDELL<br/> GITAGIGSQPPVVPWLSTVDGSWVDSPLDGEYWYRNLRPVGFFHPA<br/> VSQLQAQGDVAVFEVSASPVLLQAMDDDVVTVATLRRDDGDATR<br/> MLTALAQAAYVHGVTVDWPAILGTTTARVLDLPTYAFQHCRYWVKS<br/> VDRAAADGHPLLGAHVPELSDGVLLTGRVSLATHAWLADHAVWG<br/> RVLLPGTAFVELVVHAAGEVGCDDVDELVIETPLLLPQTGGVQLSV<br/> SVGEADESGHRVTVFVSADNADTWTRHVSATVRVSDTTVPPSDLT<br/> AWPPAQAKPVDVAGFYDQLTGMGYEYGPAFQGLQAAWRDGDVTF<br/> AEVALAEEQVREAARYAVHPALLDAALHACTLNASDAEVGVGLPFS<br/> WNGVRVHAGGSAMLRVAVTQAADGWSVRVADDIGRPVAVSGSLVT<br/> RPVTADALGSAADDLLALTWAGIPTPQQTGLTVGRFEELVSDGDVP<br/> VPEVAVFTALPDNDDPLEQTRKLTGQVLQAVQEWLGGERFSDSTL<br/> VVRTGTGLAAAASVSGWMRSAQSEHPGRFVLVESDDDALAPDQLAA<br/> AVGLDEPRLRISDGRFEAPRLRTHAAEPSEKVVWDPDGTVLITGGS<br/> GVLGIAARHLVAERGVRHLLLSRSAPDEALINQLGELGARVETA<br/> ACDVSDRAALAQVLAVSPEHPLTAVIHTAGALDDGVVESLTAQRL<br/> DAVLRPKADGAWNHELTRDADLAAFVVMYSSAAGVLSAGQANY<br/> AAANAFVDALAEQRRAEGLPALAVAWGLWEDASGLTADLTDTRD<br/> RIRRGGLRAISAEYGMGLFDSASRHSEPVLVGAAMEPVRDAEVPAL<br/> LRSLHRPIARRAASSTGDSSVQWLAALAPEERAKALLRVVCDAAATV<br/> LGHADIDSIPVTAAFKDLGVDSLTAVDLRNSLAKATGLRLPPTLVFD<br/> YPTPTALAAARLDELFLKLEDRSDTQHVWVSLASDEPIAIVGAACRFPG<br/> GVEDLESYWQLLAEGVVVSAEVPADRWDAAADWYDPD.....</p> |
| <p>MMR2026<br/>(RAPM10)</p> | <p>.....RGFAEQGLDSLMAVEIRKRLQGELGMPLSATLAFDHPTVERLVE<br/> YLLSQALELQDRTDVRSARLPATEEPLAIVGMACRLPGGVSSPEDL<br/> WRLVESGTDASGFPTDRGWDVENLYDPDPDAPGKSYSVQGGFLD<br/> AAAGFDASFFGISPREALAMDPQQRLMLEVSWEAFERAGIEPGSVR<br/> GSDTGFIGAYPGGYGIGADLGGFGTTAGAASVLSGRVSYFFGLEG<br/> PAFTVDTACSSSLVALHQAGYALRQGECSLALVGGVTVMPTPQTFV<br/> EFSRQRGLSADGRCKAFADAADGTGWAEGVGVLLVERLSDAQAN<br/> GHQILAVVRSSAVNQDGASNGLSAPNGPSQQRVIRAALSNAGLAPH<br/> EVDVVEAHGTGTTLDPIEAQAVIATYGQGRGEPLLLGSLKSNVGH<br/> TQAAAGVSGVIKVMALQHSMPRTLHVDEPSRHVDWSAGAVEL<br/> VAENQPWPETGRPRRAGVSSFGISGTNAHVILESAPAQSVGDAGST<br/> PVLVSELVPLVISAKTQPALTEHEDRLRAYLAASPGVDIRAVASTLAV<br/> TRSVFEHRAVLLGDETVTGTAVSDPRIVFVFPQGWQWLGMGSAL<br/> RDSSVVFAERMAECAALSEFVDWDLFAVLDDPAVVDRVDVVQPA<br/> SWAVMVSAAVWQAAGVRPDAVIGHSQGEIAAACVAGAVSMRDA<br/> ARIVTLRSQAIARGLAGRGAMASVALPAQDVELVDGAWIAAHNGP<br/> ASTVIAGTPEAVDHVLTALRQRGAGAADHVDYASHTPHVELIRDEL<br/> LDITSDSSSQDPLVPWLSTVDGTWVDSPLDGEYWYRNLRPVGFFHP</p>                                                                                                                                                                                                                                                                                                                                                                                                                           |

|  |                                                                                                                                                                                                                                                                                                                                                                                                                                                                                                                                                                                                                                                                                                                                                                                                                                                                                                                                                                                                                                                                                                                 |
|--|-----------------------------------------------------------------------------------------------------------------------------------------------------------------------------------------------------------------------------------------------------------------------------------------------------------------------------------------------------------------------------------------------------------------------------------------------------------------------------------------------------------------------------------------------------------------------------------------------------------------------------------------------------------------------------------------------------------------------------------------------------------------------------------------------------------------------------------------------------------------------------------------------------------------------------------------------------------------------------------------------------------------------------------------------------------------------------------------------------------------|
|  | <p>AVSQLQAQGDTVFVEVSASPVLMQAMDDDVVTVATLRRDDGDAT<br/>RMLTALAQAYVHGVTVDWRAVLGDVPATRVLDLPTYAFQHORYW<br/>AEAGRSADVSAAGLDAVGHPLLGAVLAMPGSDGVMLTGRVSLATH<br/>AWLADHAVRGSVLLPGTGFVELVVRAADEVACDVVDELIVEAPLL<br/>PQTGGVQLSVSVGEADESGHRAVTVFSRADSADAWVRHVSATVSV<br/>SDTTVPTSDLTAWPPAQAKPVDVAGFYDQLTRAGYEYGPAFQGLQA<br/>AWRDGDTVFAEVALAEEQTQDAARFAVHPAVLDAALHAGILNTPD<br/>ADRDTVRLPFSWNHVQVHVTGSATLRVAMTRVADGWGVRVADDIG<br/>RPVATIGSLVTRPVAADALGSAVDDLFWTEIPVSQQVGVTVGKF<br/>EDLADGEVMPMPDVVFTALPDSGDPLAQTRRLTAEVQAVQVWLA<br/>GERFTDSTLVVRTGTGLAAAASGLMRSQAQSEHPGRFVLVESDDDT<br/>LTPDQLAATVGLDEPRLRVIDGRYEAPRLTRTGVAEPEPEGVWDPDG<br/>TVLITGGSGVLAGIAARHLVAERGVRRHLLLSRSAPDEALISELAEL<br/>GAAVVDTAVCDVSDRAGLARVLAGVSPDHPLTAVIHTAGVLDG<br/>VESLTARRLDTVLRPKADGAWNHELTRDIDLAAFVMYSSAAGVL<br/>GSAGQGNVAVANAFVDALAEQRRAEGLPALALAWGLWEDASGLTA<br/>KLTGTDHDRIRRSGLRTITAERGMRLFDIASRQGEVPLVATPMEPVRE<br/>VEVPALLRLLHRPVARRAASTGDSSAQWLVLGLAPEERAKALLKVV<br/>RDSAATVLGHADARSIPATGAFKDLGVDSLTAVELRNSLTKATGLRL<br/>PATMVFVDPYPTADLAARLGDLMLKLEDRSDTQHVVWVSLASDEPIAIV<br/>GAACRFPGGVEDLESYWQLLAEGVVVSAEVPADRWDAAADWYDPD<br/>.....</p> |
|--|-----------------------------------------------------------------------------------------------------------------------------------------------------------------------------------------------------------------------------------------------------------------------------------------------------------------------------------------------------------------------------------------------------------------------------------------------------------------------------------------------------------------------------------------------------------------------------------------------------------------------------------------------------------------------------------------------------------------------------------------------------------------------------------------------------------------------------------------------------------------------------------------------------------------------------------------------------------------------------------------------------------------------------------------------------------------------------------------------------------------|

**Table S2.** Yields of epothilones in mutants of *Schlegelella brevitalea* DSM 7029.

| Strain                | Epothilone yield (mg l <sup>-1</sup> ) <sup>a</sup> |        |        |
|-----------------------|-----------------------------------------------------|--------|--------|
|                       | C (3)                                               | D (4)  | total  |
| 104-1                 | 19.85                                               | 27.67  | 47.52  |
| MMR2024 (ERYM6)       | 0.004                                               | 0.014  | 0.018  |
| MMR2027 (RAPM4)       | nd                                                  | nd     | nd     |
| MMR2026 (RAPM10)      | nd                                                  | nd     | nd     |
| MMR2044 (EPOM7)       | 0.015                                               | 0.017  | 0.032  |
| MMR2048 (EPOAT2)      | 8.53                                                | 26.91  | 35.44  |
| MMR2049 (EPOAT6)      | 6.68                                                | 30.04  | 36.72  |
| MMR2017 (EPOAT7)      | 6.11                                                | 28.30  | 34.41  |
| MMR2016 (EPOAT8)      | 7.63                                                | 29.72  | 37.35  |
| MMR2018 (RAPAT1)      | <0.001                                              | 0.017  | 0.017  |
| MMR2012 (ERYAT6)      | <0.001                                              | <0.001 | <0.001 |
| MMR2029 (EPOAT3)      | 55.08                                               | nd     | 55.08  |
| MMR2020 (EPOAT9)      | 47.27                                               | nd     | 47.27  |
| MMR2021 (EPOAT5)      | 42.53                                               | nd     | 42.53  |
| MMR2033 (A185T)       | 59.77                                               | nd     | 59.77  |
| MMR2034 (I209A)       | 47.11                                               | nd     | 47.11  |
| MMR2035 (F310S)       | 20.34                                               | 11.26  | 31.60  |
| MMR2039 (V383L)       | 46.90                                               | nd     | 46.90  |
| MMR2040 (G426R)       | 46.57                                               | nd     | 46.57  |
| MMR2041 (F310S-H308V) | 15.35                                               | 11.63  | 26.98  |
| MMR2042 (F310S-H308Y) | 24.99                                               | 8.29   | 33.28  |
| MMR2055 (S310F)       | 50.34                                               | nd     | 50.34  |
| MMR2037               | nd                                                  | nd     | nd     |
| MMR2019               | 22.49                                               | 28.13  | 50.62  |
| MMR2038               | 25.33                                               | 28.33  | 53.66  |
| MMR2053               | nd                                                  | nd     | nd     |
| MMR2054               | 19.61                                               | 22.14  | 41.75  |

nd not detected

<sup>a</sup> The yields of epothilones are averages of three biological replicates under identical cultivation conditions.

**Table S3.** Alignment of nine amino acids that differ in EPOAT3 and EPOAT4. Nine amino acids in an MMCoA/MCoA-specific AT domain are shown in red; nine amino acids in MCoA-specific AT domains are shown in green; nine amino acids in MMCoA-specific AT domains are shown in orange. Four amino acids (Pro165, Gln175, Val204, and Ala205) that are identical in three AT domains (EPOAT4, EPOAT5, and EPOAT9) are highlighted in yellow.

| M/MM   | M      | M      | M      | MM     | MM     | MM     | MM     | MM     | MM     |
|--------|--------|--------|--------|--------|--------|--------|--------|--------|--------|
| EPOAT4 | EPOAT3 | EPOAT5 | EPOAT9 | EPOAT2 | EPOAT6 | EPOAT7 | EPOAT8 | ERYAT6 | RAPAT1 |
| Pro165 | A      | P      | P      | E      | E      | E      | E      | P      | /      |
| Gln175 | E      | Q      | Q      | R      | R      | R      | R      | R      | R      |
| Thr185 | A      | A      | A      | A      | A      | A      | A      | S      | A      |
| Val204 | L      | L      | V      | V      | V      | V      | V      | V      | V      |
| Ala205 | V      | L      | A      | I      | V      | V      | V      | I      | V      |
| Ala209 | I      | I      | L      | M      | M      | M      | M      | Q      | Q      |
| Ser310 | F      | F      | F      | S      | S      | S      | S      | S      | S      |
| Leu383 | V      | V      | V      | V      | V      | I      | I      | V      | V      |
| Arg426 | G      | A      | G      | A      | A      | T      | T      | R      | Q      |

**Table S4.** Primers used for the construction of plasmids and verification of mutant strains.

| Primer | Sequence (5'–3') *                            | Use                                                             |
|--------|-----------------------------------------------|-----------------------------------------------------------------|
| JM01-F | GACTACCGGGCGGCATATCATGGGTGCTGCA<br>CACCCCTTAC | Amplification of upstream<br>homologous arm for <i>epoAT4</i>   |
| JM01-R | GCTCATCCCCGAACGAGCTCA                         |                                                                 |
| JM02-F | TGAGCTCGTTCGGGATGAGCCTGCCGACCTA<br>TCCGTGGCA  | Amplification of downstream<br>homologous arm for <i>epoAT4</i> |
| JM02-R | TACATCGACGAGCAGATGCT                          |                                                                 |
| JM03-F | TGAGCTCGTTCGGGATGAGCGGCACCAACGC<br>CCATGTTCGT | Amplification of <i>epoAT2</i>                                  |
| JM03-R | CGGTACCCGCCGCCCGCCCG                          |                                                                 |
| JM04-F | TGAGCTCGTTCGGGATGAGCGGGACCAACGC<br>GCACGTGGT  | Amplification of <i>epoAT6</i>                                  |
| JM04-R | CGGCACGCGACGGAGGCCCG                          |                                                                 |
| JM05-F | TGAGCTCGTTCGGGATGAGCGGGACCAACGC<br>GCATGTGGT  | Amplification of <i>epoAT7</i>                                  |
| JM05-R | CGGAACCCGCCTGCCGCCCG                          |                                                                 |
| JM06-F | TGAGCTCGTTCGGGATGAGCGGGACCAACG<br>CGCATGTGGT  | Amplification of <i>epoAT8</i>                                  |
| JM06-R | CGGAACCCGCCTGCCGCCCG                          |                                                                 |
| JM07-F | TGAGCTCGTTCGGGATGAGCGGTACGAACG<br>CCCACGTTCAT | Amplification of <i>rapAT1</i>                                  |
| JM07-R | GTCCAGCACCCGGGCTGCGG                          |                                                                 |
| JM08-F | TGAGCTCGTTCGGGATGAGCGGGACGAACG<br>CGCACGTGAT  | Amplification of <i>eryAT6</i>                                  |
| JM08-R | CGCCACCGGAGGTGCCGCCCG                         |                                                                 |
| JM09-F | TGAGCTCGTTCGGGATGAGCGGAACGAACG<br>CGCACGTGGT  | Amplification of <i>epoAT3</i>                                  |
| JM09-R | CGGCACCCGCCGCCAGCCG                           |                                                                 |
| JM10-F | TGAGCTCGTTCGGGATGAGCGGAACCAACG<br>TGCATGTTCGT | Amplification of <i>epoAT5</i>                                  |
| JM10-R | AGCCACGCGGCGCGCCAT                            |                                                                 |
| JM11-F | TGAGCTCGTTCGGGATGAGCGGCACCAACG<br>TCCATGTTCGT | Amplification of <i>epoAT9</i>                                  |
| JM11-R | CGGTACCCGCCGTCCGCCCG                          |                                                                 |
| JM12-F | CCGAAGAGGTCCGGCAAAGTC                         | <i>epoAT4</i> replacement verification<br>for upstream fragment |



|        |                                                            |                                                                                             |
|--------|------------------------------------------------------------|---------------------------------------------------------------------------------------------|
| JM12-R | CGCCTTTGGTCACGTAAGTC                                       | <i>epoAT4</i> replacement verification for downstream fragment                              |
| JM13-R | GCCTGCAGATGATCTCGTAG                                       | <i>epoAT2</i> verification for upstream fragment                                            |
| JM13-F | ACAACCTCAGGCAGCCTGTG                                       | <i>epoAT2</i> verification for downstream fragment                                          |
| JM14-R | AGCTGCGAGGTGGTCTCATC                                       | <i>epoAT6</i> verification for upstream fragment                                            |
| JM14-F | ACGAGCGCCTGTCCATGTTG                                       | <i>epoAT6</i> verification for downstream fragment                                          |
| JM15-R | CCAAGCTCGACATGCTTCTC                                       | <i>eryAT7</i> and <i>epoAT8</i> verification for upstream fragment                          |
| JM15-F | CATGGGCCGAAAGCTCATGG                                       | <i>eryAT7</i> and <i>epoAT8</i> verification for downstream fragment                        |
| JM16-R | CCAGCTCCGAATCCACTACG                                       | <i>rapAT1</i> verification for upstream fragment                                            |
| JM16-F | GGTACCGGAACTTGCGTGAG                                       | <i>rapAT1</i> verification for downstream fragment                                          |
| JM17-R | CCAATGCCGTCAACGGAACC                                       | <i>eryAT6</i> verification for upstream fragment                                            |
| JM17-F | GCCACCTTCGTCGAGATGAG                                       | <i>eryAT6</i> verification for downstream fragment                                          |
| JM18-R | CTGTCCGGTGAACAGCAACG                                       | <i>epoAT3</i> verification for upstream fragment                                            |
| JM18-F | TCGCTGGTGAGCAACCTGAG                                       | <i>epoAT3</i> verification for downstream fragment                                          |
| JM19-R | AAGCCAGCTTACCGCGTGAG                                       | <i>epoAT5</i> verification for upstream fragment                                            |
| JM19-F | AGTATTGGGTCCGGCATGTG                                       | <i>epoAT5</i> verification for downstream fragment                                          |
| JM20-R | GAACAGGAAGGCGAGCTTGC                                       | <i>epoAT9</i> verification for upstream fragment                                            |
| JM20-F | GAAATTCGTGCAGCAGATCG                                       | <i>epoAT9</i> verification for downstream fragment                                          |
| JM21-F | <i>CATTGGTAACTCGAGCTGTGGTGGTCACGG</i><br><i>ACGAGCTGAG</i> | Amplification of upstream homologous arm for <i>epo-module4</i>                             |
| JM21-R | <i>CTCTGTCCGCCGGAACCGAG</i>                                |                                                                                             |
| JM22-F | <i>TCCGGTCGGTGGCGGCGGATGAGCCCATCG</i><br><i>CCATCGTGGG</i> | Amplification of downstream homologous arm for <i>epo-module4</i> (for <i>epo-module7</i> ) |
| JM22-R | <i>GGGATACGCACGAAGAGGCT</i>                                |                                                                                             |

|        |                                               |                                                                                                                                          |
|--------|-----------------------------------------------|------------------------------------------------------------------------------------------------------------------------------------------|
| JM23-F | CTGAAGCTGGAGGATCGCAG                          | Amplification of downstream homologous arm for <i>epo-module4</i> (for <i>ery-module7</i> , <i>rap-module4</i> and <i>rap-module10</i> ) |
| JM23-R | GGGATACGCACGAAGAGGCT                          |                                                                                                                                          |
| JM24-F | CTCGGTTGCCGGCGACAGAGGAGCCGATCG<br>CCATCGTGGG  | Amplification of <i>epo-module7</i>                                                                                                      |
| JM24-R | ATCCGCCGCCACCGACCGGA                          |                                                                                                                                          |
| JM25-F | CTCGGTTGCCGGCGACAGAGGACCCGATCG<br>CGATCGTCCG  | Amplification of <i>ery-module6</i>                                                                                                      |
| JM25-R | CTGCGATCCTCCAGCTTCAGGAGCTGCTGTC<br>CTATGTGGT  |                                                                                                                                          |
| JM26-F | CTCGGTTGCCGGCGACAGAGGAGCCGTTGG<br>CGATTGTGGG  | Amplification of <i>rap-module4</i>                                                                                                      |
| JM26-R | CTGCGATCCTCCAGCTTCAGGAACAACCTCG<br>TCCAGCCGGG |                                                                                                                                          |
| JM27-F | CTCGGTTGCCGGCGACAGAGGAGCCGCTGG<br>CGATCGTGGG  | Amplification of <i>rap-module10</i>                                                                                                     |
| JM27-R | CTGCGATCCTCCAGCTTCAGCATGAGGTCG<br>CCCAGCCGGG  |                                                                                                                                          |
| JM28-F | TCGTTGTTGCTCGACGAGAC                          | <i>epo-module4</i> replacement verification for upstream fragment                                                                        |
| JM28-R | CATGCCGGACCCAATACTCG                          | <i>epo-module4</i> replacement verification for downstream fragment                                                                      |
| JM29-R | CGCTTGAGCACGATCAGACC                          | <i>epo-module7</i> verification for upstream fragment                                                                                    |
| JM29-F | TGGCTCTGGAGATCCGTAAC                          | <i>epo-module7</i> verification for downstream fragment                                                                                  |
| JM30-R | ACCCACACGCCGAATGCAAG                          | <i>ery-module6</i> verification for upstream fragment                                                                                    |
| JM30-F | CGCAGGAGTTGCTGGAGTTC                          | <i>ery-module6</i> verification for downstream fragment                                                                                  |
| JM31-R | CTGCACGCAATACGACTTCC                          | <i>rap-module4</i> verification for upstream fragment                                                                                    |
| JM31-F | CTACCGGTGACTCGTCAGTG                          | <i>rap-module4</i> verification for downstream fragment                                                                                  |
| JM32-R | CCTGCACGCTGTAGGACTTC                          | <i>rap-module10</i> verification for upstream fragment                                                                                   |
| JM32-F | CGGTGCGTTCAAGGATTTGG                          | <i>rap-module10</i> verification for downstream fragment                                                                                 |

|        |                                                      |                                                                                                                              |
|--------|------------------------------------------------------|------------------------------------------------------------------------------------------------------------------------------|
| JM33-F | GACTACCGGGCGGCATATCATGGGTGCTGC<br>ACACCCTTAC         | Amplification of upstream<br>homologous arm for <i>epoAT3</i><br>( <i>epo-module4</i> ) in MMR2029                           |
| JM33-R | CTCCGCCACATCACCTCGC                                  |                                                                                                                              |
| JM34-F | GCTAGGGAAGATGCCAGGAAGGTGTTCTCG<br>CTGGAAGATG         | Amplification of downstream<br>homologous arm for <i>epoAT3</i><br>( <i>epo-module4</i> ) in MMR2029                         |
| JM34-R | AGCATCTGCTCGTCGATGTA                                 |                                                                                                                              |
| JM35-R | GCGAGATCACCAAGGTAGTC                                 | <i>aadA</i> verification for upstream<br>fragment                                                                            |
| JM35-F | CTCCACCGCTGATGACATGC                                 | <i>aadA</i> verification for<br>downstream fragment                                                                          |
| JM36-F | ACGGCGTTCACCCAGCCGCGCTCTTCA <b>ACG</b><br>GTGGAGTACG | Targeted mutagenesis of <i>epoAT3</i><br>( <i>epo-module4</i> ) in MMR2029 to<br>change Ala185 to Thr                        |
| JM36-R | GCGGGCTGGGTGAACGCCGT                                 |                                                                                                                              |
| JM37-F | TGGGGCGTAGAGCCGGAGCTCCTGGTTGGG<br>CATAGC <b>GCCG</b> | Targeted mutagenesis of <i>epoAT3</i><br>( <i>epo-module4</i> ) in MMR2029 to<br>change Ile209 to Ala                        |
| JM37-R | AGCTCCGGCTCTACGCCCA                                  |                                                                                                                              |
| JM38-F | CGTGCGACCAAGCGGCTGCATGTCTCGCA<br>CGCGT <b>TCCAC</b>  | Targeted mutagenesis of <i>epoAT3</i><br>( <i>epo-module4</i> ) in MMR2029 to<br>change Phe310 to Ser                        |
| JM38-R | GCAGCCGCTTGGTGCGCAG                                  |                                                                                                                              |
| JM39-F | GGACGTT <b>CTC</b> GAAGTGGGCCCGAAGCCGA<br>CGCTGCTCGG | Targeted mutagenesis of <i>epoAT3</i><br>( <i>epo-module4</i> ) in MMR2029 to<br>change Val383 to Leu                        |
| JM39-R | GCCCACTT <b>CAG</b> GAACGTCC                         |                                                                                                                              |
| JM40-F | GGC <b>AGG</b> CTGTGGGCCGGCGGCTCGGT<br>CAGCTGGCCGG   | Targeted mutagenesis of <i>epoAT3</i><br>( <i>epo-module4</i> ) in MMR2029 to<br>change Gly426 to Arg                        |
| JM40-R | CCGCCGGCCACAG <b>CCT</b> GCC                         |                                                                                                                              |
| JM41-F | GTCTCG <b>GTCGCGTCC</b> ACTCGCCGCTGATG<br>GAACCGATGC | Targeted mutagenesis of <i>epoAT3</i><br>( <i>epo-module4</i> ) in MMR2029 to<br>change His308 to Val and<br>Phe310 to Ser   |
| JM41-R | GAGTG <b>GGACGCGAC</b> CGAGAC                        |                                                                                                                              |
| JM42-F | GTCTCG <b>TACGCGTCC</b> ACTCGCCGCTGATG<br>GAACCGATGC | Targeted mutagenesis of <i>epoAT3</i><br>( <i>epo-module4</i> ) in MMR2029 to<br>change His308 to Tyr and<br>Phe310 to Ser   |
| JM42-R | GAGTG <b>GGACGCGTAC</b> CGAGAC                       |                                                                                                                              |
| JM43-F | <b>GTTCC</b> ACTCGCCGCTGATGGAACCGATGCT<br>GGAGGAGTTC | Targeted mutagenesis of <i>epoAT4</i><br>( <i>epo-module4</i> ) in 104-1 to<br>change Ser310 to Phe                          |
| JM43-R | CCATCAGCGGCGAGTG <b>GAA</b> C                        |                                                                                                                              |
| JM44-F | CCAACCTTGGGCACATGGAG                                 | Verification for mutation of<br><i>epoAT3</i> ( <i>epo-module4</i> ) in<br>MMR2029 and mutation of<br><i>epoAT4</i> in 104-1 |
| JM44-R | TCGCCTCCTCTGATTTCTGG                                 |                                                                                                                              |

|        |                                                     |                                                                       |
|--------|-----------------------------------------------------|-----------------------------------------------------------------------|
| JM45-F | <i>GACTACCGGGCGGCATATCAATGGCCACTG</i><br>CCGGACATTC | Amplification of upstream homologous arm for <i>epoDH9-ΨKR9-ER9</i>   |
| JM45-R | ACCCAGAAGGGGGTGGCCCC                                |                                                                       |
| JM46-F | <i>GGGGCCACCCCTTCTGGGTGAATCCAGCG</i><br>TCGCCGTCCG  | Amplification of downstream homologous arm for <i>epoDH9-ΨKR9-ER9</i> |
| JM46-R | TCATTTTGCCTCGAACGCCG                                |                                                                       |
| JM47-F | <i>GACTACCGGGCGGCATATCAACCAAACCGC</i><br>TGCATGTCTC | Amplification of upstream homologous arm for <i>epoER9</i>            |
| JM47-R | CTGAGCGTCGGGCAGCCGGT                                |                                                                       |
| JM48-F | <i>ACCGGCTGCCCGACGCTCAGGAATCCAGCG</i><br>TCGCCGTCCG | Amplification of downstream homologous arm for <i>epoER9</i>          |
| JM48-R | TCATTTTGCCTCGAACGCCG                                |                                                                       |
| JM49-F | <i>GCATTGGTAACTCGAGCTGTGACATGGCGA</i><br>TCGGATCTGG | Amplification of upstream homologous arm for <i>epoDH9</i>            |
| JM49-R | TCATTTTGCCTCGAACGCCG                                |                                                                       |
| JM50-F | <i>AAAGGAATAGGGTGCTGGGAGGAGACGCTC</i><br>GCGTATTGCT | Amplification of downstream homologous arm for <i>epoDH9</i>          |
| JM50-R | GAGTTGGACGACTCGCTGAC                                |                                                                       |
| JM51-F | TGGTCGGGAGTCTTCCCTTC                                | Verification for inactive domains deletions of <i>epo-module9</i>     |
| JM51-R | AGCAGCCCGTCATCCACAAG                                |                                                                       |
| JM52-F | <i>GTAGCACCTGAAGTCAGCCCACACGCCTC</i><br>TAGAACCCATC | Amplification of upstream homologous arm for <i>ΨKR9-KR9-linker</i>   |
| JM52-R | ACCGCGCAGCGCGACCTCCT                                |                                                                       |
| JM53-F | <i>AGGAGGTCGCGCTGCGCGGTGGCACCTAC</i><br>CTTGTGACCGG | Amplification of downstream homologous arm for <i>ΨKR9-KR9-linker</i> |
| JM53-R | GGGCTGACTTCAGGTGCTAC                                |                                                                       |
| JM54-F | <i>AGGAGGTCGCGCTGCGCGGTGGGCGCCGG</i><br>CGCGCAGCGCG | Amplification of <i>ΨKR3-KR3-linker</i>                               |
| JM54-R | CCGGTCACAAGGTAGGTGCCCTCCGCAGA<br>CAGCGACACCG        |                                                                       |
| JM55-F | CAGATGTCGATGCCGATGCC                                | Verification for <i>ΨKR9-KR9-linker</i> deletion and replacement      |
| JM55-R | ACAAGACCTGCCGCATGCAC                                |                                                                       |

\* Homologous arms for In-Fusion cloning are in italics, and the position of point mutations leading to amino acid changes in the target proteins are highlighted in red.

**Table S5.** Plasmids used in this study.

| <b>Plasmid</b> | <b>Relevant characteristics*</b>                                                                                                                                   | <b>Source</b> |
|----------------|--------------------------------------------------------------------------------------------------------------------------------------------------------------------|---------------|
| pJM1           | p15A_ori, <i>sacB</i> , <i>Apra<sup>R</sup></i>                                                                                                                    | Lab stock     |
| pJM2           | p15A_ori, <i>sacB</i> , <i>Amp<sup>R</sup></i> , <i>Hyg<sup>R</sup></i>                                                                                            | Lab stock     |
| pJM3           | p15A_ori, <i>sacB</i> , <i>Amp<sup>R</sup></i> , <i>Apra<sup>R</sup></i>                                                                                           | Lab stock     |
| pJM4           | p15A_ori, <i>sacB</i> , <i>Spec<sup>R</sup></i> , <i>Apra<sup>R</sup></i>                                                                                          | Lab stock     |
| pJM5           | pJM1 derivative containing <i>epoAT4</i> upstream and downstream fragments, <i>Apra<sup>R</sup></i>                                                                | This study    |
| pJM6           | pJM5 with <i>epoAT2</i> , <i>Apra<sup>R</sup></i>                                                                                                                  | This study    |
| pJM7           | pJM5 with <i>epoAT6</i> , <i>Apra<sup>R</sup></i>                                                                                                                  | This study    |
| pJM8           | pJM5 with <i>epoAT7</i> , <i>Apra<sup>R</sup></i>                                                                                                                  | This study    |
| pJM9           | pJM5 with <i>epoAT8</i> , <i>Apra<sup>R</sup></i>                                                                                                                  | This study    |
| pJM10          | pJM5 with <i>rapAT1</i> , <i>Apra<sup>R</sup></i>                                                                                                                  | This study    |
| pJM11          | pJM5 with <i>eryAT6</i> , <i>Apra<sup>R</sup></i>                                                                                                                  | This study    |
| pJM12          | pJM5 with <i>epoAT3</i> , <i>Apra<sup>R</sup></i>                                                                                                                  | This study    |
| pJM13          | pJM5 with <i>epoAT5</i> , <i>Apra<sup>R</sup></i>                                                                                                                  | This study    |
| pJM14          | pJM5 with <i>epoAT9</i> , <i>Apra<sup>R</sup></i>                                                                                                                  | This study    |
| pJM15          | pJM4 derivative containing <i>epoAT3</i> ( <i>epo-module4</i> ) upstream and downstream fragments, <i>Spec<sup>R</sup></i> , <i>Apra<sup>R</sup></i>               | This study    |
| pJM16          | pJM5 with <i>epoAT3</i> mutant encoding EPOAT3 (A185T), <i>Apra<sup>R</sup></i>                                                                                    | This study    |
| pJM17          | pJM5 with <i>epoAT3</i> mutant encoding EPOAT3 (I209A), <i>Apra<sup>R</sup></i>                                                                                    | This study    |
| pJM18          | pJM5 with <i>epoAT3</i> mutant encoding EPOAT3 (F310S), <i>Apra<sup>R</sup></i>                                                                                    | This study    |
| pJM19          | pJM5 with <i>epoAT3</i> mutant encoding EPOAT3 (V383L), <i>Apra<sup>R</sup></i>                                                                                    | This study    |
| pJM20          | pJM5 with <i>epoAT3</i> mutant encoding EPOAT3 (G426R), <i>Apra<sup>R</sup></i>                                                                                    | This study    |
| pJM21          | pJM5 with <i>epoAT3</i> mutant encoding EPOAT3 (F310S, H308V), <i>Apra<sup>R</sup></i>                                                                             | This study    |
| pJM22          | pJM5 with <i>epoAT3</i> mutant encoding EPOAT3 (F310S, H308Y), <i>Apra<sup>R</sup></i>                                                                             | This study    |
| pJM23          | pJM5 with <i>epoAT4</i> mutant encoding EPOAT4 (S310F), <i>Apra<sup>R</sup></i>                                                                                    | This study    |
| pJM24          | pJM1 derivative containing <i>epoDH9-ΨKR9-ER9</i> upstream and downstream fragments, <i>Apra<sup>R</sup></i>                                                       | This study    |
| pJM25          | pJM3 derivative containing <i>epoER9</i> upstream and downstream fragments, <i>Amp<sup>R</sup></i> , <i>Apra<sup>R</sup></i>                                       | This study    |
| pJM26          | pJM2 derivative containing <i>epoDH9</i> upstream and downstream fragments, <i>Amp<sup>R</sup></i> , <i>Hyg<sup>R</sup></i>                                        | This study    |
| pJM27          | pJM1 derivative containing <i>ΨKR9-KR9-linker</i> upstream and downstream fragments, <i>Apra<sup>R</sup></i>                                                       | This study    |
| pJM28          | pJM27 with <i>ΨKR3-KR3-linker</i> , <i>Apra<sup>R</sup></i>                                                                                                        | This study    |
| pJM29          | pJM3 derivative containing <i>epo-module7</i> together with <i>epo-module4</i> upstream and downstream fragments, <i>Amp<sup>R</sup></i> , <i>Apra<sup>R</sup></i> | This study    |
| pJM30          | pJM3 derivative containing <i>ery-module6</i> together with <i>epo-module4</i> upstream and downstream fragments, <i>Amp<sup>R</sup></i> , <i>Apra<sup>R</sup></i> | This study    |

|       |                                                                                                                                                                     |            |
|-------|---------------------------------------------------------------------------------------------------------------------------------------------------------------------|------------|
| pJM31 | pJM3 derivative containing <i>rap-module4</i> together with <i>epo-module4</i> upstream and downstream fragments, <i>Amp<sup>R</sup></i> , <i>Apra<sup>R</sup></i>  | This study |
| pJM32 | pJM3 derivative containing <i>rap-module10</i> together with <i>epo-module4</i> upstream and downstream fragments, <i>Amp<sup>R</sup></i> , <i>Apra<sup>R</sup></i> | This study |

\* *Amp<sup>R</sup>* ampicillin resistance, *Apra<sup>R</sup>* apramycin resistance, *Hyg<sup>R</sup>* hygromycin resistance, *Spec<sup>R</sup>* spectinomycin resistance

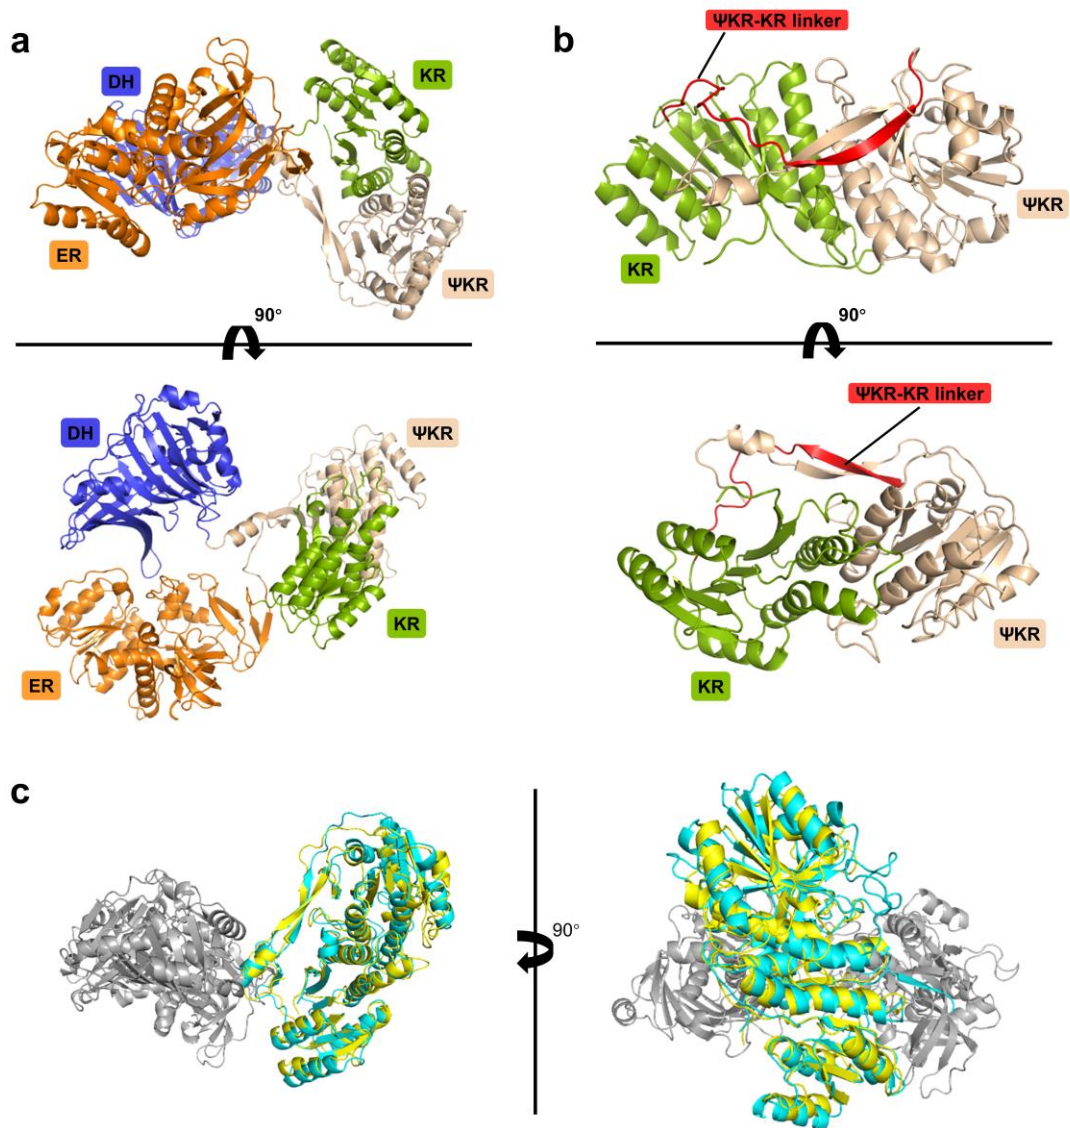

**Figure S1.** Structural models of reducing domains in wild-type and mutant EPOM9s. **a** Structural models of DH9-ΨKR9-ER9-KR9 domains of the wild-type EPOM9. **b** Structural models of the ΨKR9-KR9 didomain of the mutant EPOM9 (deleted DH9 and ER9 domains). **c** ΨKR9-KR9 structural model (shown in yellow) superimposed on the DH9-ΨKR9-ER9-KR9 model (shown in blue); the calculated RMSD = 1.980, which shows these two models are similar.

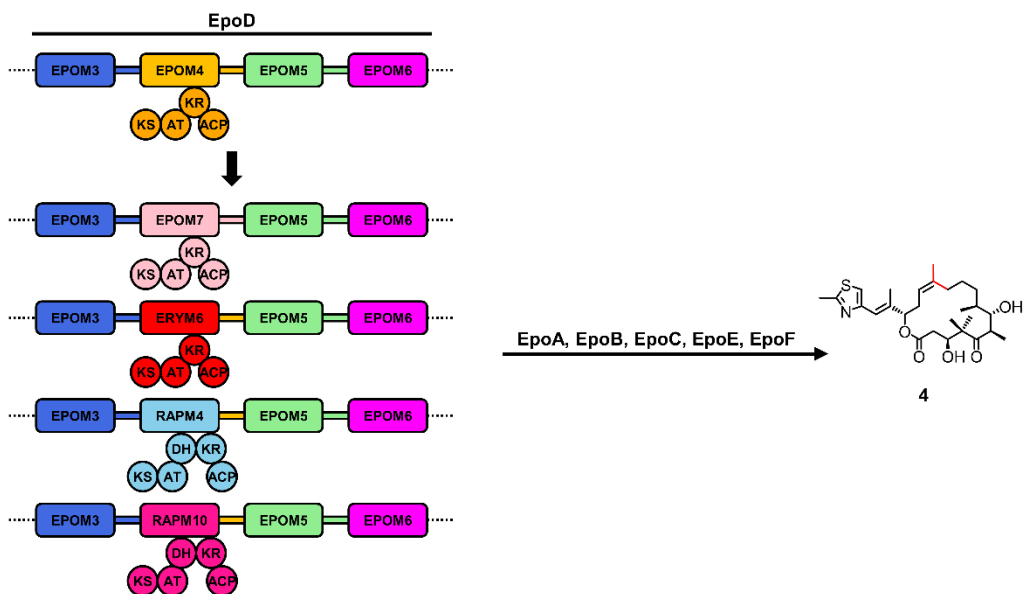

**Figure S2.** Engineering the epothilone PKS by whole-module swapping. The EPOM4 was replaced with EPOM7 while the natural intermodular linker between EPOM3 and EPOM4 (shown in blue) and the linker between EPOM7 and EPOM8 (shown in pink) were retained. EPOM4 was replaced with ERYM6, RAPM4, or RAPM10 while the natural intermodular linker between EPOM3 and EPOM4 (shown in blue) and the linker between EPOM4 and EPOM5 (shown in orange) were retained.



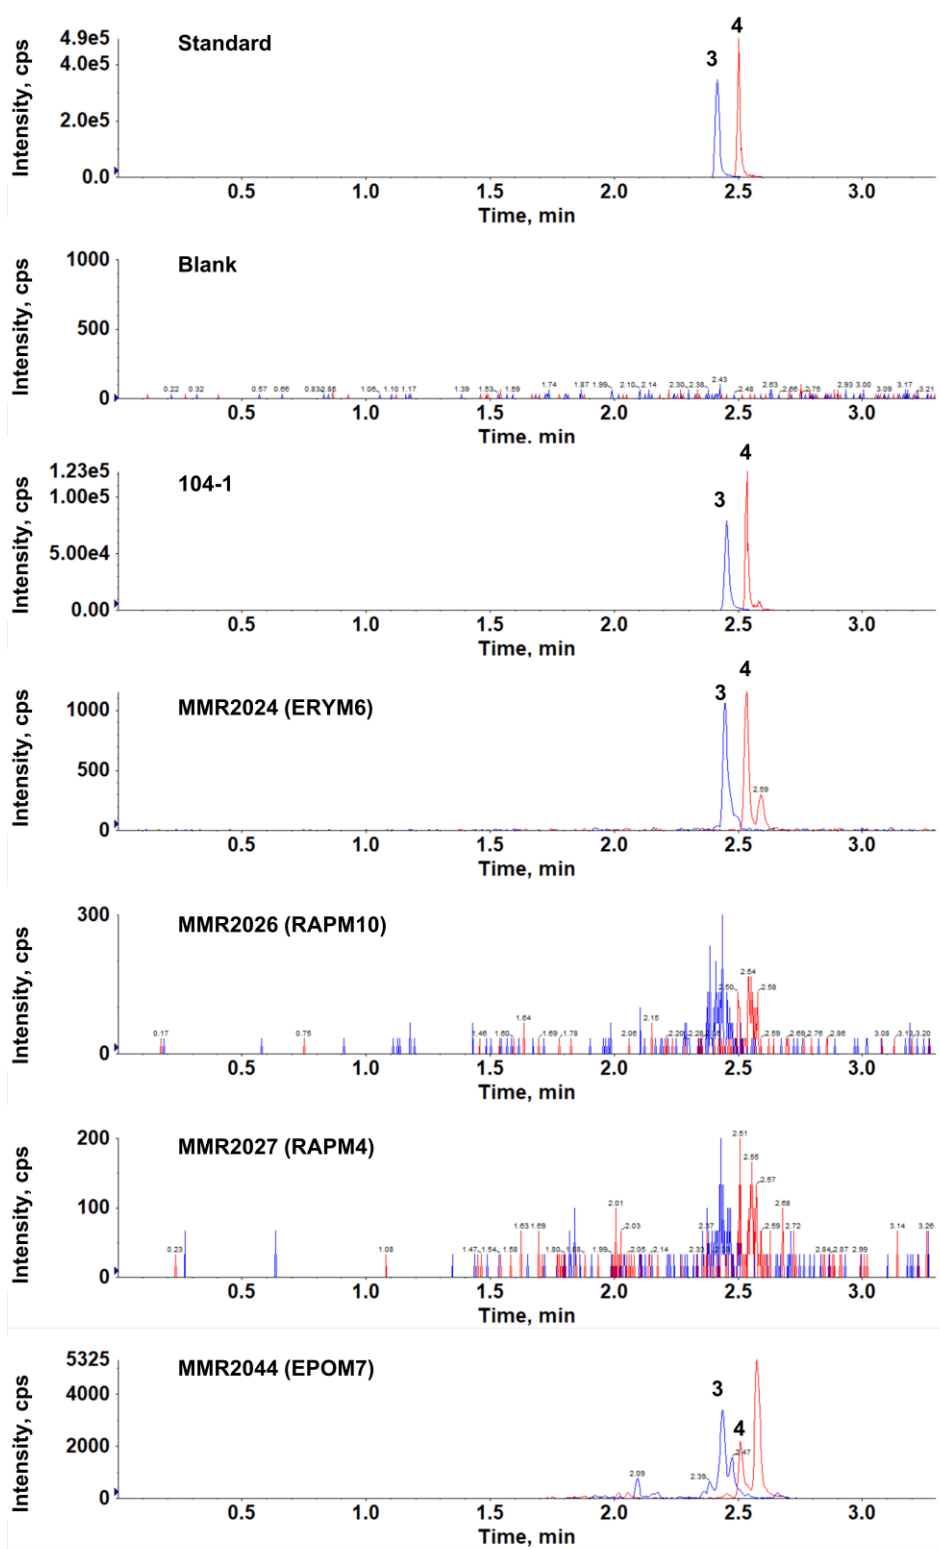

**Figure S3.** Extracted ion chromatogram (EIC) of LC–MS analyses of epothilone production in EPOM4-swap mutants. Peaks corresponding to epothilone C (selected for  $m/z = 478.4$  and  $290.2$ ), epothilone D (selected for  $m/z = 492.4$  and  $304.2$ ) were shown in blue and red, respectively.

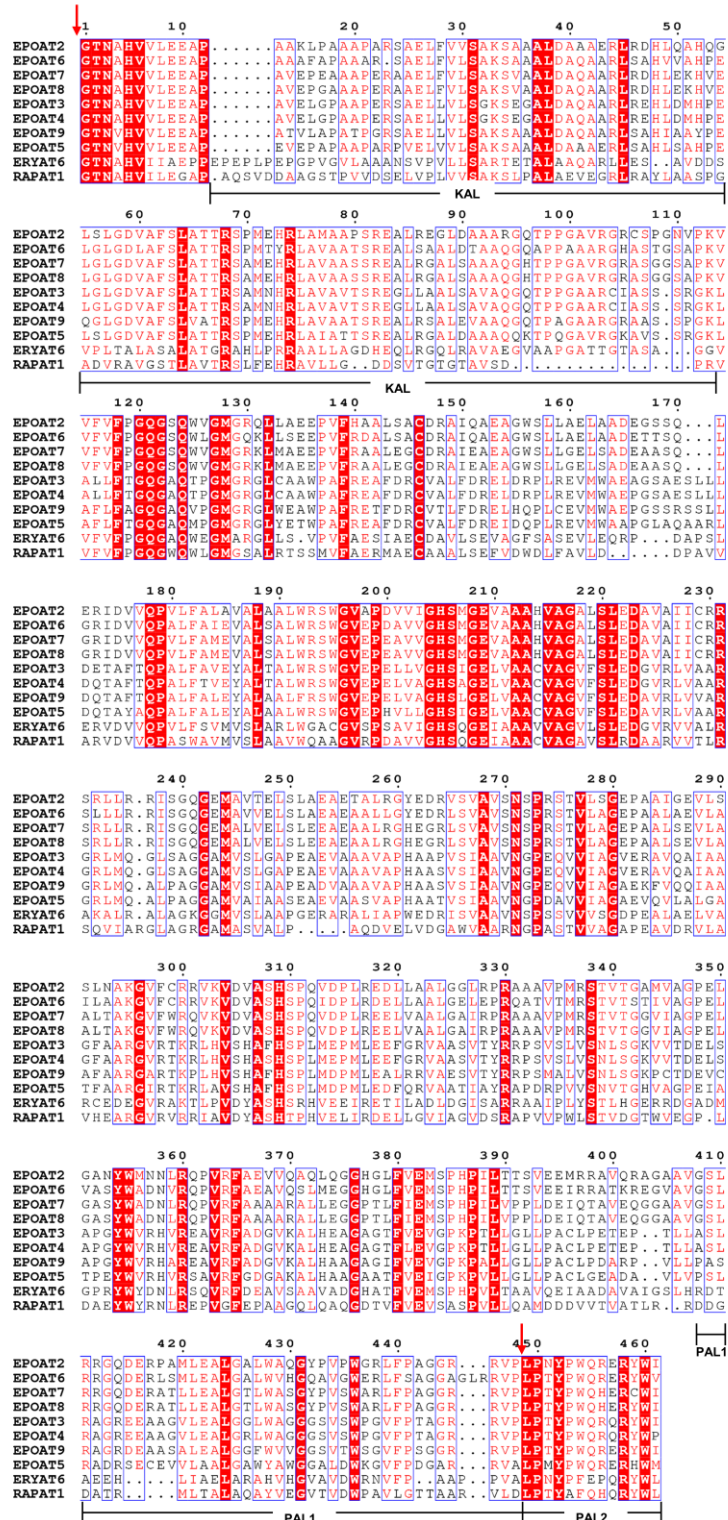

**Figure S4.** Multiple sequence alignment of AT domains used in this study. Red arrows indicate boundaries for AT swap. EPO, epothilone PKS; ERY, erythromycin PKS; RAP, rapamycin PKS; KAL, KS-AT linker; PAL1, non-conserved N-terminal region in the post-AT linker; PAL2, conserved C-terminal region in the post-AT linker.

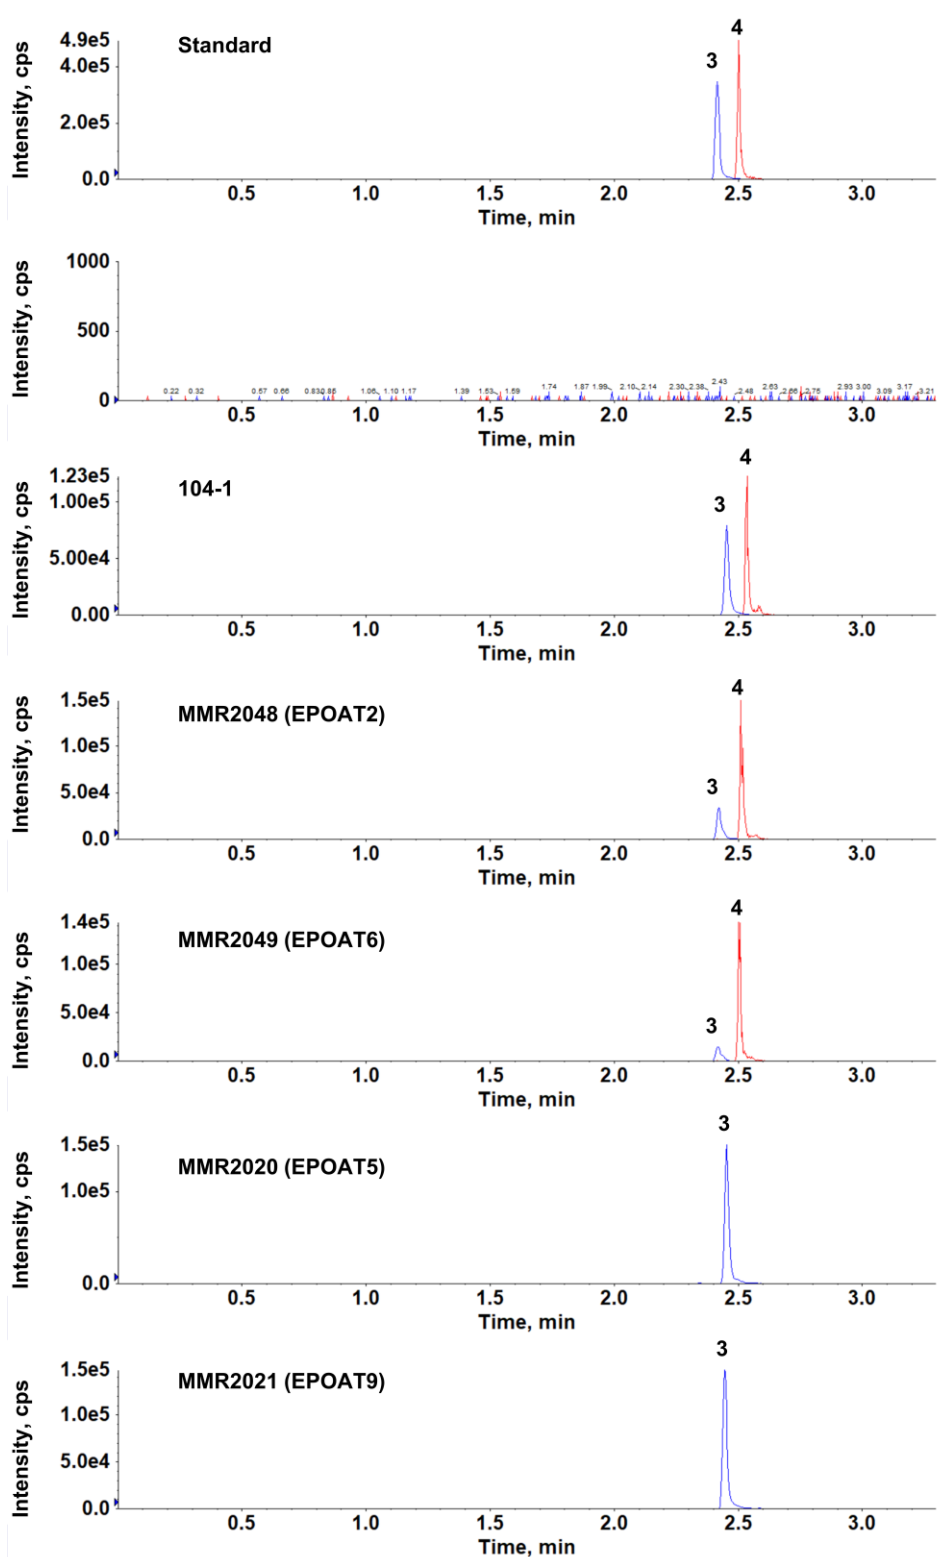

**Figure S5.** Extracted ion chromatogram (EIC) of LC–MS analyses of epothilone production in some AT-swap mutants to further confirm the production of epothilones. Peaks corresponding to epothilone C (selected for  $m/z = 478.4$  and  $290.2$ ), epothilone D (selected for  $m/z = 492.4$  and  $304.2$ ) were shown in blue and red, respectively.

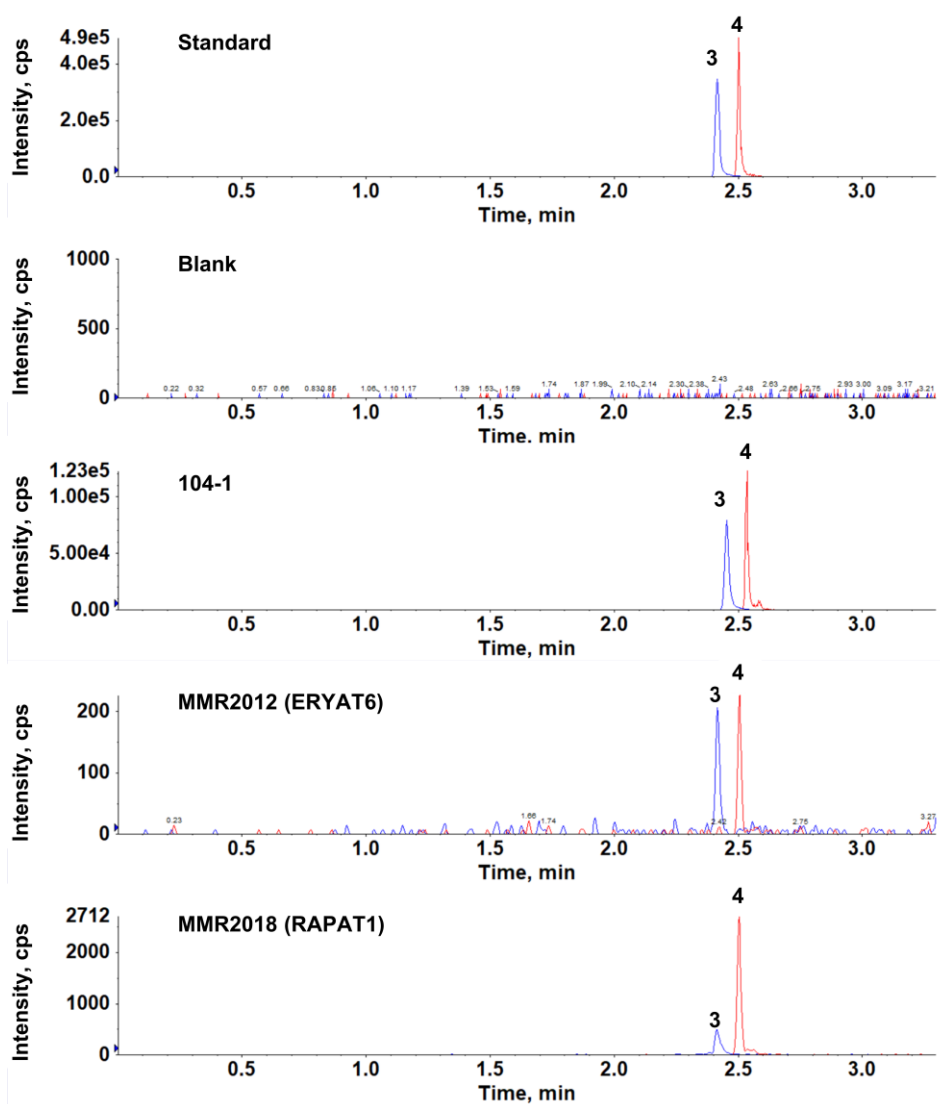

**Figure S6.** Extracted ion chromatogram (EIC) of LC-MS analyses of epothilone production in AT-swap mutants MMR2012 and MMR2018. Peaks corresponding to epothilone C (selected for  $m/z = 478.4$  and  $290.2$ ), epothilone D (selected for  $m/z = 492.4$  and  $304.2$ ) were shown in blue and red, respectively.

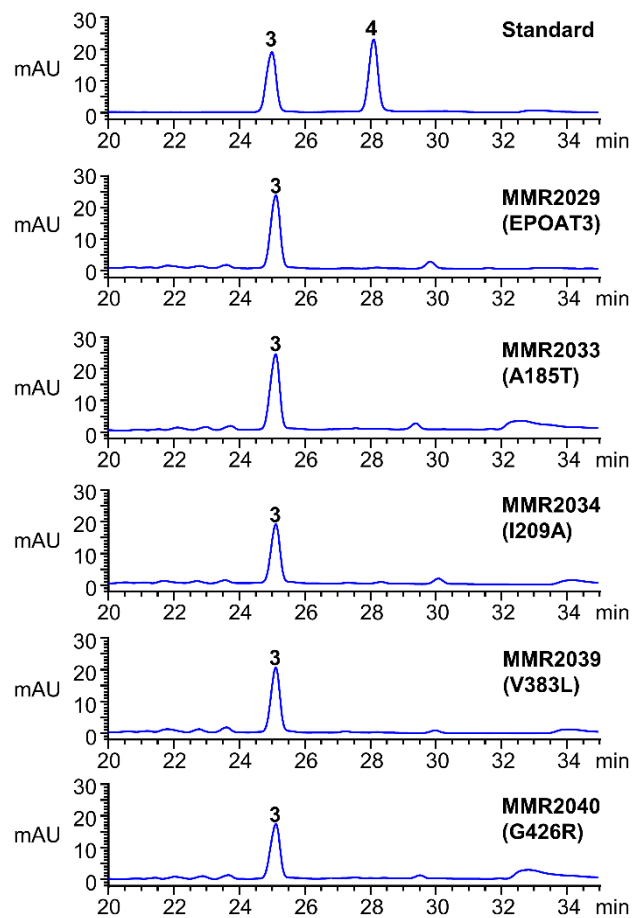

**Figure S7.** HPLC analysis of the extracts from the parental and site-directed mutant strains.



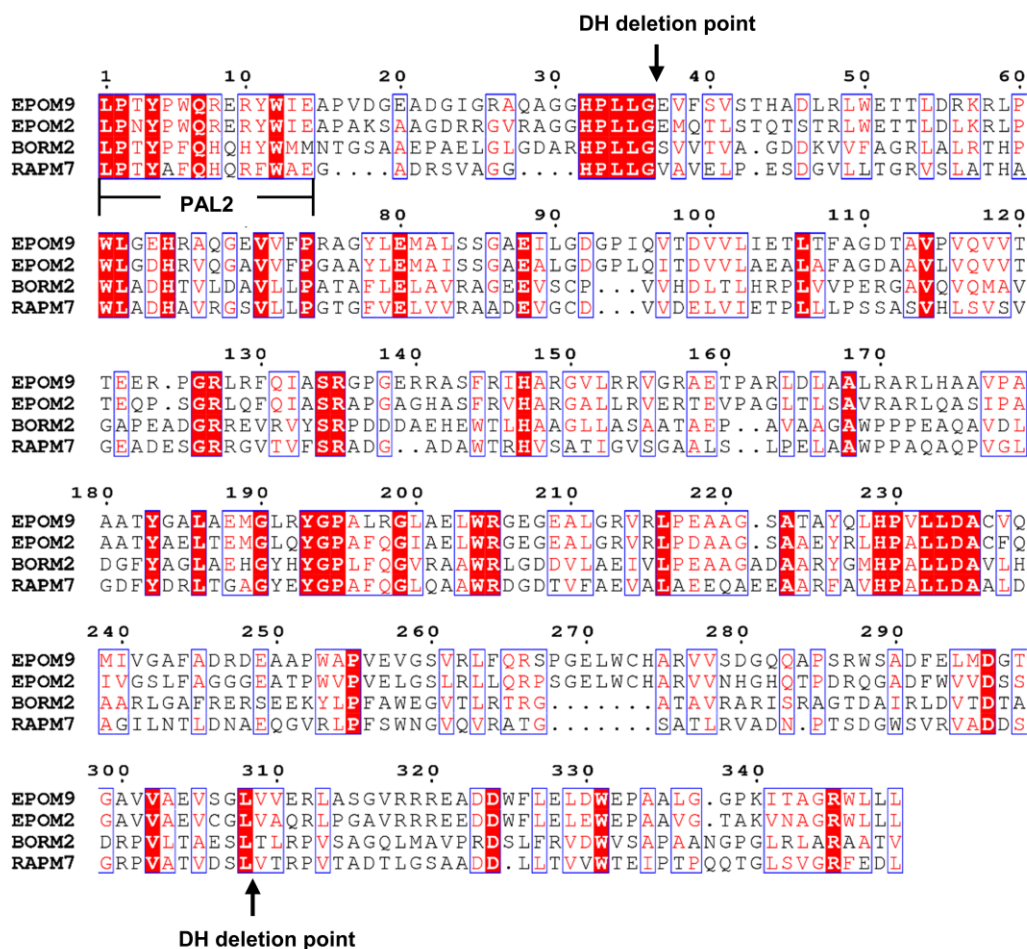

**Figure S9.** Junctions for DH domain deletion constructs. Arrows indicate deletion points. BOR: borrelidin PKS [1]; RAP: rapamycin PKS.



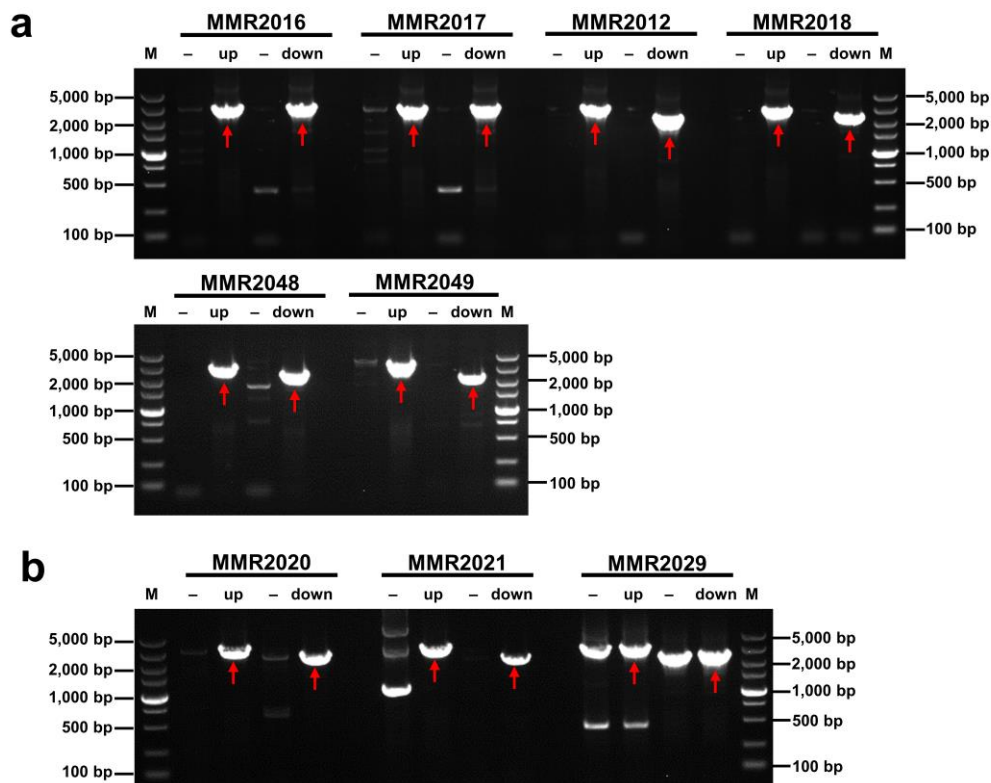

**Figure S10.** PCR analysis for the confirmation of AT-swap mutants. **a** PCR analysis for the replacement of EPOAT4 with MMC<sub>o</sub>A-specific ATs, which resulted in MMR2016, MMR2017, MMR2012, MMR2018, MMR2048, and MMR2049. **b** PCR analysis for the replacement of EPOAT4 with MCoA-specific ATs, which resulted in MMR2020, MMR2021, and MMR2029. –, PCR analysis with genomic DNA from *Schlegelella brevitalea* 104-1, which was used as a negative control. Red arrows indicate the expected up-AT<sub>4</sub>swap and AT<sub>4</sub>swap-down fragments in seven mutant strains that were amplified by PCR using the primers JM12-F/R and JM20-F/R (Additional file 1: Table S3). The up-AT<sub>4</sub>swap and AT<sub>4</sub>swap-down fragments are 2932 bp and 3053 bp long for MMR2016 and MMR2017, 2958 bp and 2284 bp for MMR2012, 2856 bp and 2351 bp for MMR2018, 2917 bp and 2364 bp for MMR2048, 3274 bp and 2199 bp for MMR2049, 3116 bp and 2532 bp for MMR2020, 3108 bp and 2370 bp for MMR2021, and 3125 bp and 2425 bp for MMR2029. The expected DNA fragments were obtained from both 104-1 and MMR2029 (EPOAT3) because EPOAT3 and EPOAT4 differ in only nine amino acids. All PCR products were then sequenced, and the results further confirmed that EPOAT4 in the epothilone biosynthetic gene cluster was successfully replaced with non-native AT domains by double crossover.



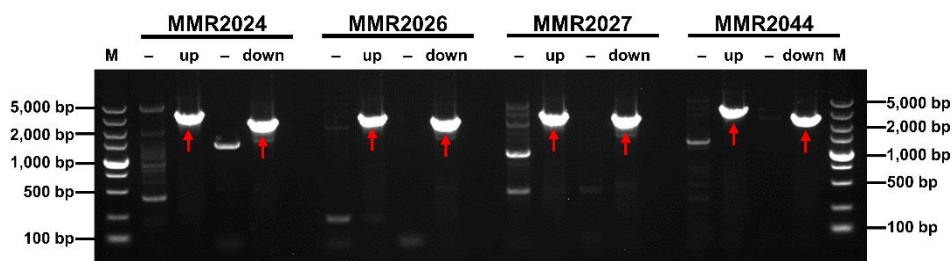

**Figure S11.** PCR analysis for the confirmation of module-exchange mutants. PCR analysis for the substitution of EPOM4 with modules that harbour MMCoA-specific AT domains, which resulted in MMR2024, MMR2026, MMR2027, and MMR2044. –, PCR analysis with genomic DNA from *Schlegelella brevitalea* 104-1, which was used as a negative control. Red arrows indicate the expected up-M4swap and M4swap-down fragments in four mutant strains by PCR that were generated using the primers JM28-F/R and JM32-F/R (Additional file 1: Table S3). The up-M4swap and M4swap-down fragments are 3274 bp and 2616 bp long for MMR2024, 2908 bp and 2537 bp for MMR2026, 2907 bp and 2670 bp for MMR2027, and 3446 bp and 2502 bp for MMR2044. All PCR products were then sequenced, and the results further confirmed that EPOM4 in the epothilone biosynthetic gene cluster was successfully replaced with non-native modules by double crossover.

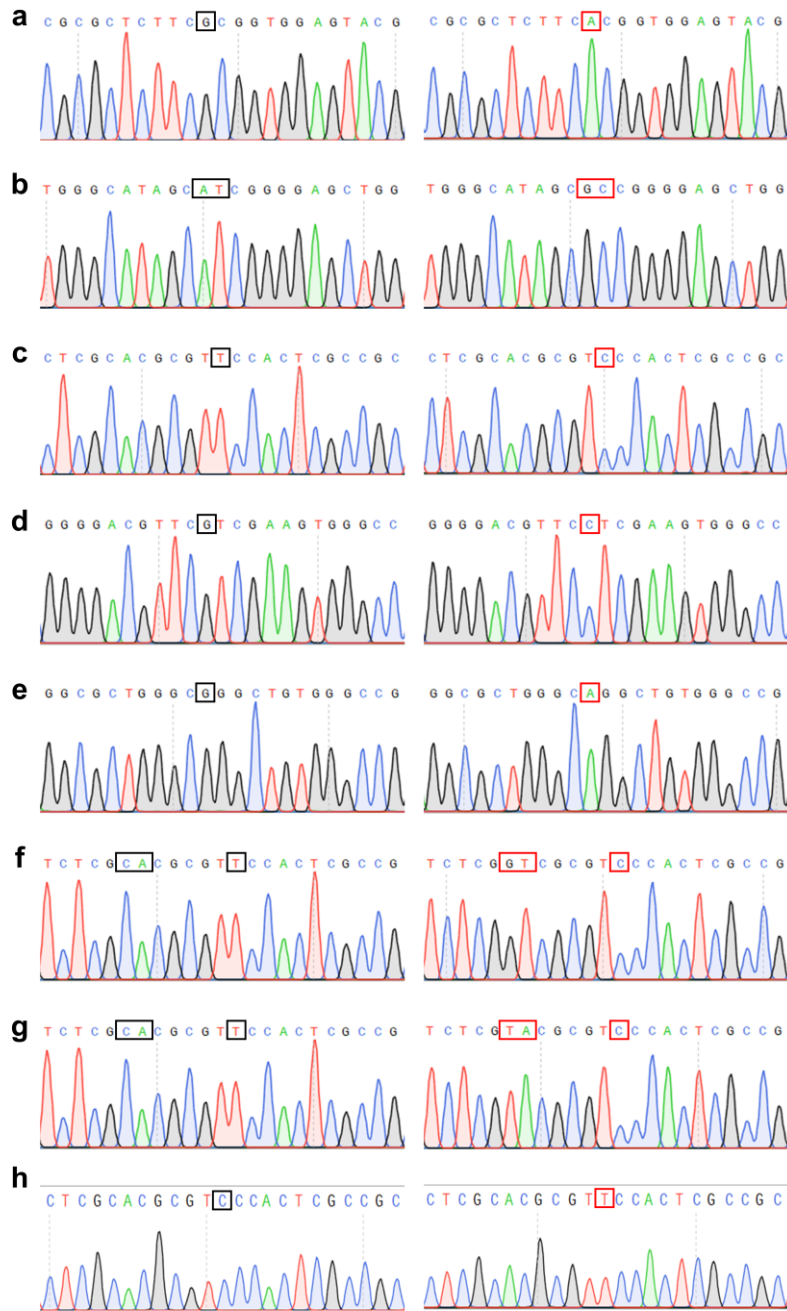

**Figure S12.** DNA sequences of the PCR products of site-directed mutants. The left column in **a-g** shows DNA sequences of the PCR products of parent strain MMR2029. The left column in **h** shows DNA sequences of the PCR products of parent strain 104-1. The right column shows DNA sequences of the PCR products of site-directed mutants. **a** MMR2029 and MMR2033 (A185T). **b** MMR2029 and MMR2034 (I209A). **c** MMR2029 and MMR2035 (F310S). **d** MMR2029 and MMR2039 (V383L). **e** MMR2029 and MMR2040 (G426R). **f** MMR2029 and MMR2041 (F310S-H308V). **g** MMR2029 and MMR2042 (F310S-H308Y). **h** 104-1 and MMR2055 (S310F). The mutated bases are highlighted with red boxes, and the corresponding bases in MMR2029 and 104-1 are highlighted with black boxes.



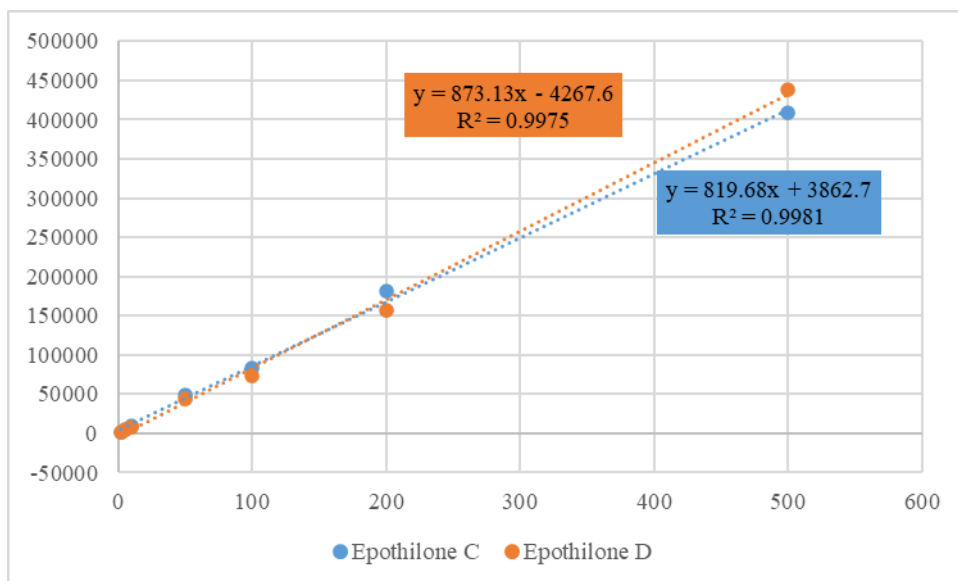

**Figure S14.** Standard curves calculated based on the peak areas of epothilone standards of different concentrations. Different concentrations of each epothilone component (1 ng/ml, 5 ng/ml, 10 ng/ml, 50 ng/ml, 100 ng/ml, 200 ng/ml, and 500 ng/ml) were used to test the standard curves.

## References

1. Hagen A, Poust S, Rond T, Fortman JL, Katz L, Petzold CJ, Keasling JD: **Engineering a Polyketide Synthase for In Vitro Production of Adipic Acid.** *ACS SYNTH BIOL* 2016, **5**(1):21-27.
